# Supplementary material for: Evolutionary genomics of Leishmania braziliensis across the neotropical realm
Source: PubMed Central journal article supplement (PMC11605123; doi:10.1038/s42003-024-07278-z), 2024-11-28
Supplement: 42003_2024_7278_MOESM2_ESM.pdf [file 42003_2024_7278_MOESM2_ESM.pdf]

# Description of Additional Supplementary Files

**File name:** Supplementary data 1

**Description:** All supplementary tables associated to the manuscript.

**File name:** Supplementary data 2

**Description:** All available source data associated to the figures of the manuscript.
